# Supplementary material for: The Role of Human Chorionic Gonadotropin Beta (hCGβ) in HPV-Positive and HPV-Negative Oropharyngeal Squamous Cell Carcinoma
Source: MDPI journal article supplement (doi:10.3390/cancers14122830), 2022-06-08
Supplement: s1 [file s1]

**Table S1.** Clinicopathological data according to hCG $\beta$ -expression in the tumor tissue. Abbreviations: hCG $\beta$ : Human chorionic gonadotropin; HPV: Human papillomavirus. hCG $\beta$  immunoexpression was scored in the nuclei of the tumor tissue.

| Variable                     | hCG $\beta$ Positivity in Tumor Tissue | %     | hCG $\beta$ Negativity in Tumor Tissue | %    | <i>p</i> -Value | Missing/ % (n=18) |
|------------------------------|----------------------------------------|-------|----------------------------------------|------|-----------------|-------------------|
| Number of patients           | 12                                     | 66.7  | 6                                      | 33.3 |                 |                   |
| Mean age at diagnosis        | 66.1                                   |       | 63.5                                   |      | 0.854           |                   |
| Gender                       |                                        |       |                                        |      |                 |                   |
| Male                         | 8                                      | 66.7  | 4                                      | 33.3 |                 |                   |
| Female                       | 4                                      | 66.7  | 2                                      | 33.3 | 1.000           |                   |
| Smoking                      |                                        |       |                                        |      |                 |                   |
| Non-smoker                   | 2                                      | 50.0  | 2                                      | 50.0 |                 |                   |
| Ex-smoker                    | 3                                      | 60.0  | 2                                      | 40.0 |                 |                   |
| Current smoker               | 7                                      | 77.8  | 2                                      | 22.2 | 0.548           |                   |
| Heavy alcohol use            |                                        |       |                                        |      |                 | 3 / 16.7          |
| Non-drinker                  | 5                                      | 83.3  | 1                                      | 16.7 |                 |                   |
| Ex-drinker                   | 1                                      | 50.0  | 1                                      | 50.0 |                 |                   |
| Current drinker              | 5                                      | 71.4  | 2                                      | 28.6 | 0.769           |                   |
| T class                      |                                        |       |                                        |      |                 |                   |
| T1–T2                        | 8                                      | 57.1  | 6                                      | 42.9 |                 |                   |
| T3–T4                        | 4                                      | 100.0 | 0                                      | 0.0  | 0.245           |                   |
| N class                      |                                        |       |                                        |      |                 |                   |
| N0–N1                        | 8                                      | 61.5  | 5                                      | 38.5 |                 |                   |
| N2–N3                        | 4                                      | 80.0  | 1                                      | 20.0 | 0.615           |                   |
| Stage                        |                                        |       |                                        |      |                 |                   |
| I–II                         | 6                                      | 54.5  | 5                                      | 45.5 |                 |                   |
| III–IV                       | 6                                      | 85.7  | 1                                      | 14.3 | 0.316           |                   |
| Grade                        |                                        |       |                                        |      |                 |                   |
| I                            | 7                                      | 87.5  | 1                                      | 12.5 |                 |                   |
| II                           | 5                                      | 50.0  | 5                                      | 50.0 |                 |                   |
| III                          | 12                                     | 66.7  | 6                                      | 33.3 | 0.094           |                   |
| Localization                 |                                        |       |                                        |      |                 |                   |
| Tonsil                       | 6                                      | 60.0  | 4                                      | 40.0 |                 |                   |
| Base of tongue               | 2                                      | 66.7  | 1                                      | 33.3 |                 |                   |
| Soft palate                  | 3                                      | 75.0  | 1                                      | 25.0 |                 |                   |
| Posterior wall of oropharynx | 1                                      | 100.0 | 0                                      | 0.0  | 1.000           |                   |
| HPV                          |                                        |       |                                        |      |                 |                   |
| HPV+                         | 4                                      | 50.0  | 4                                      | 50.0 |                 |                   |
| HPV-                         | 8                                      | 80.0  | 2                                      | 20.0 | 0.321           |                   |
| S- hCG $\beta$               |                                        |       |                                        |      |                 |                   |
| S-hCG $\beta$ +              | 4                                      | 33.3  | 8                                      | 66.7 |                 |                   |
| S-hCG $\beta$ -              | 1                                      | 16.7  | 5                                      | 83.3 | 0.615           |                   |
